# Supplementary material for: The Fatty Acid Receptor GPR40 Plays a Role in Insulin Secretion In Vivo After High-Fat Feeding
Source: Oxford University Press journal article supplement (doi:10.2337/db08-0553), 2008-06-17
Supplement: db08-05531_suppl.doc [file db08-05531_suppl.doc]

|  | WT-RD | WT-HF | KO-RD | KO-HF |
| --- | --- | --- | --- | --- |
| Weight gain (g) | 6.1 ± 0.7 | 14.5 ± 1.3* | 5.6 ± 0.8 | 11.5 ± 1.9* |
| Food intake (kcal/g/day) | 0.58 ± 0.02 | 0.64 ± 0.05 | 0.61 ± 0.02 | 0.62 ± 0.05 |
| Subcutaneous fat (g) | 0.19 ± 0.02 | 1.12 ± 0.13* | 0.11 ± 0.02 | 0.84 ± 0.16* |
| Infra-renal fat (g) | 0.04 ± 0.00 | 0.39 ± 0.07* | 0.03 ± 0.00 | 0.29 ± 0.06* |
| Brown adipose tissue (g) | 0.07 ± 0.01 | 0.15 ± 0.02* | 0.11 ± 0.01 | 0.20 ± 0.05* |
| AUCglucose OGTT week 8 | 11,715 ± 1,104 | 18,517 ± 1,612* | 13,183 ± 1,496 | 17, 847 ± 997* |
| AUCglucose IVGTT week 10 | 12,613 ± 1,491 | 19,024 ± 2,445* | 10, 949 ± 1,049 | 15, 348 ± 3,189* |
| GPR40 mRNA | 1.0 ± 0.2 | 0.4 ± 0.2 | ND | ND |
| GPR120 mRNA | 1.0 ± 0.4 | 0.7 ± 0.3 | 1.3 ± 0.4 | 0.7 ± 0.2 |
| CD36 mRNA | 1.0 ± 0.3 | 1.4 ± 0.2 | 5.2 ± 0.4** | 2.6 ± 0.5 |
| CPT-1 mRNA | 1.0 ± 0.2 | 0.9 ± 0.2 | 6.7 ± 1.0** | 1.1 ± 0.2 |

Table 1: Metabolic parameters of GPR40 KO and WT mice fed RD or HFD, and gene expression levels in islets. Values are expressed as mean ± SE of n=9-12 animals per group *: P<0.05 vs. RD and **: P<0.05 vs. WT.

#

Supplementary Table 1: Sequence of oligonucleotide primers.

| Gene | Forward primer | Reverse primer |
| --- | --- | --- |
| CD36 | 5’ctatctacgctgtgttcg3’ | 5’caatggttgtctggattctgg3’ |
| CPT1 | 5’ggttcaagctgttcaagatagc3’ | 5’ccacatagaggcagaagagg3’ |
| GPR40 | 5’ggcttcctagctgctctcag3’ | 5’actgttgtccagccagcttc3’ |
| GPR120 | 5’acaacatgtcgctgttcagg3’ | 5’ttacatgcacaccgtggttc3’ |
| -actin | 5’agccatgtacgtagccatcc3’ | 5’tctcagctgtggtggtgaag3’ |

# SUPPLEMENTAL FIGURE LEGENDS

Supplementary Figure S1: A: Glucose levels during oral glucose tolerance test before the start of diet. B: Glucose levels during insulin tolerance test before the start of diet. Values are expressed as mean ± SE of 17-24 mice per group.

Supplementary Figure S2: A: Glucose levels during oral glucose tolerance test after 8 weeks of RD. B: Glucose levels during insulin tolerance test after 9 weeks of RD. Values are expressed as mean ± SE of 6-11 mice per group.

# **Supplementary** Figure 1

###

###

### Supplementary Figure 2
