# Supplementary figures and images for: The Fatty Acid Receptor GPR40 Plays a Role in Insulin Secretion In Vivo After High-Fat Feeding
Source: PubMed Central journal article supplement — Diabetes. 2008 Sep;57(9):2432–7. doi: 10.2337/db08-0553 (PMC2518494; doi:10.2337/db08-0553), 2008-09

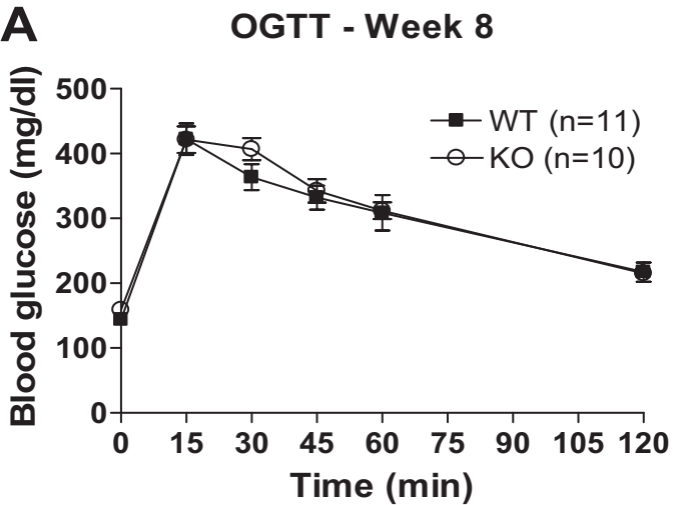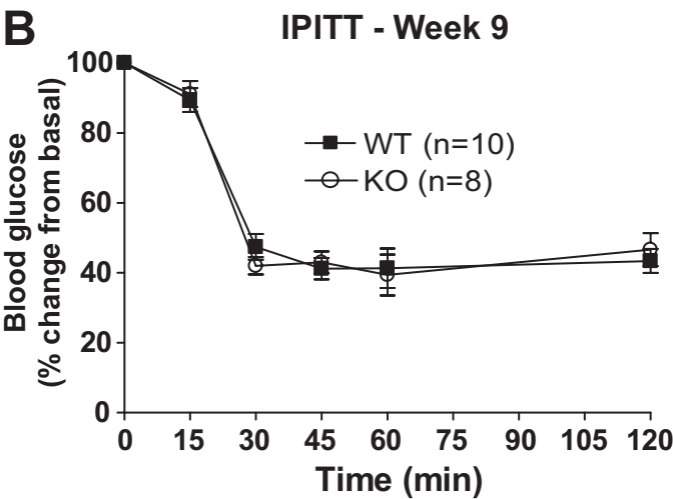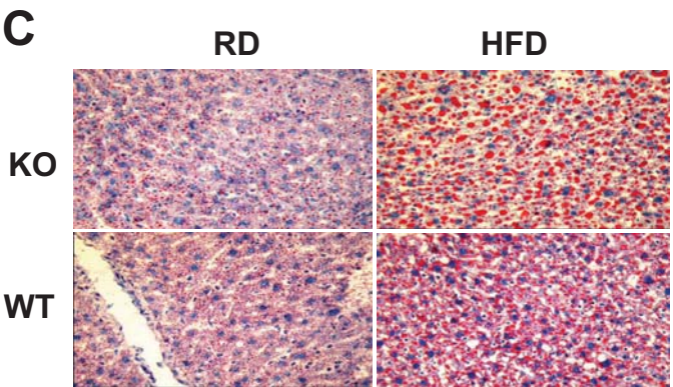

Supplement: db08-0553v2_1.pdf [file db08-0553v2_1.pdf]
